# Supplementary material
Source: PubMed Central journal article supplement (PMC9899989)
Supplement: sj-pdf-1-ebm-10.1177_15353702231151241.pdf [file sj-pdf-1-ebm-10.1177_15353702231151241.pdf]

### Viral Infectivity

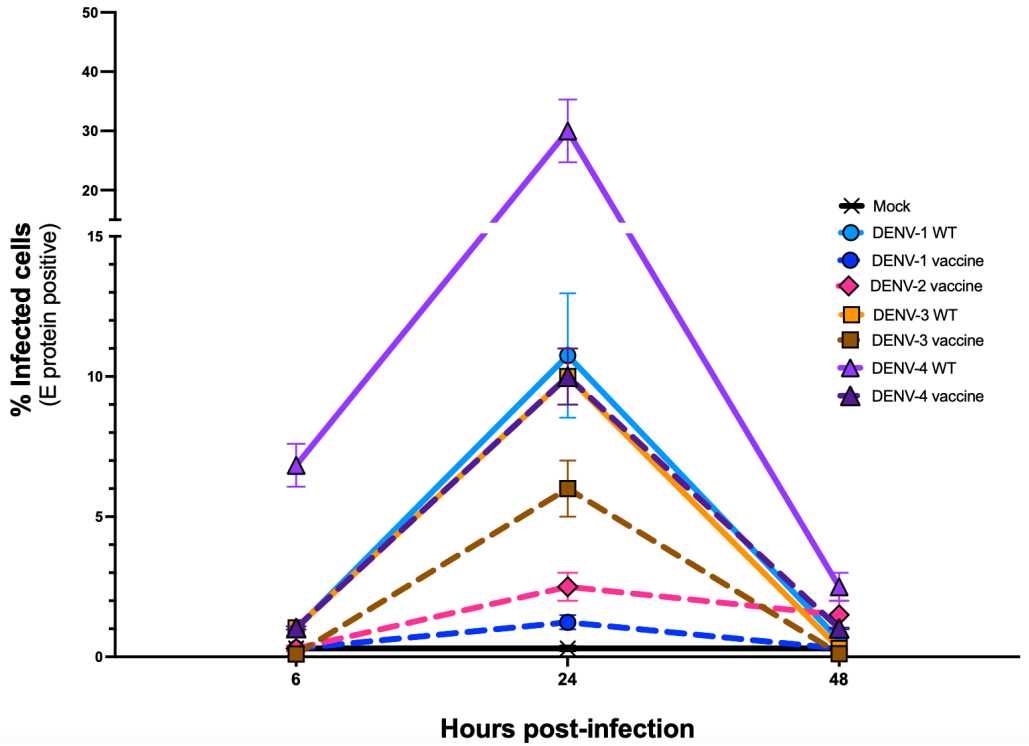

### 24 hpi

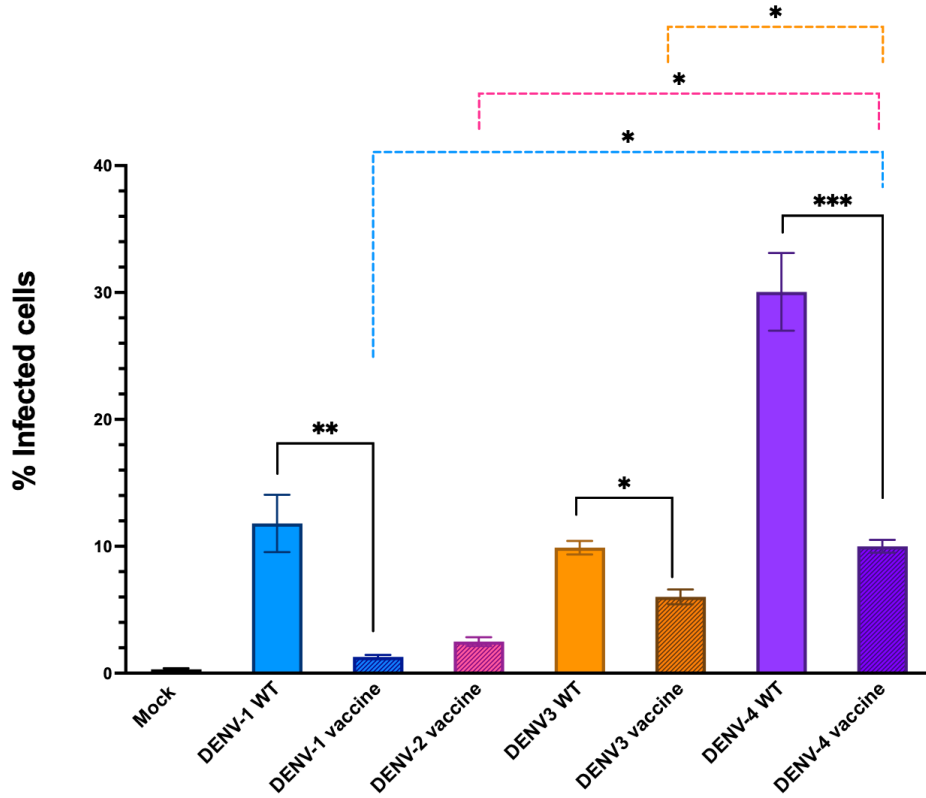

**A**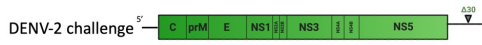**B**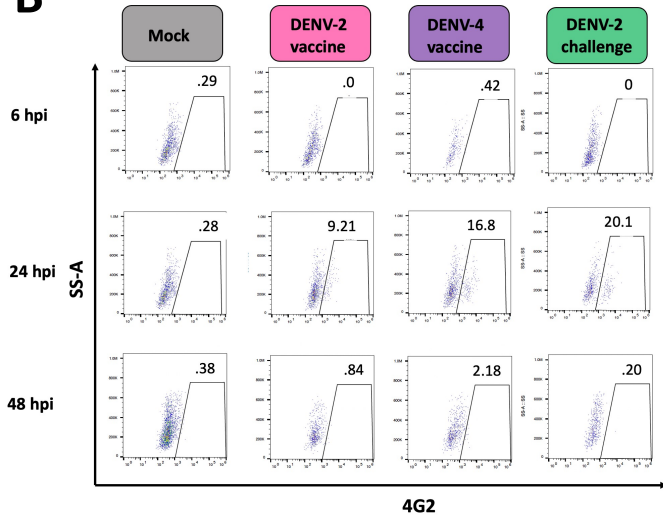**C**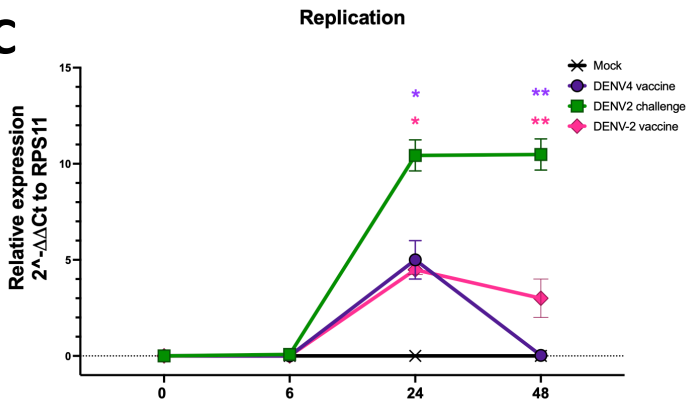**D**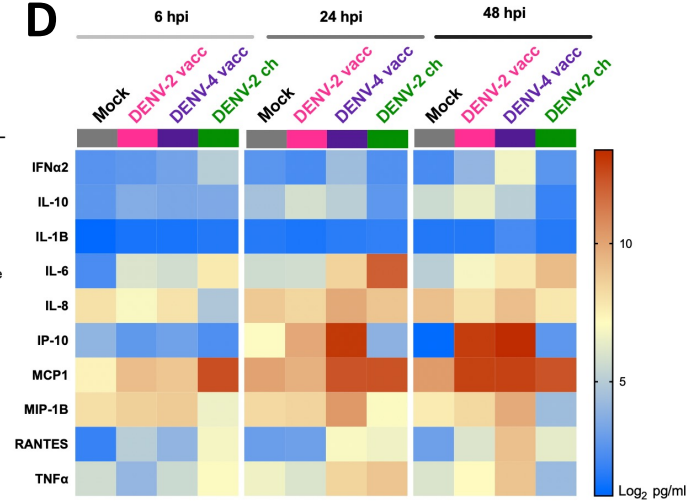**E**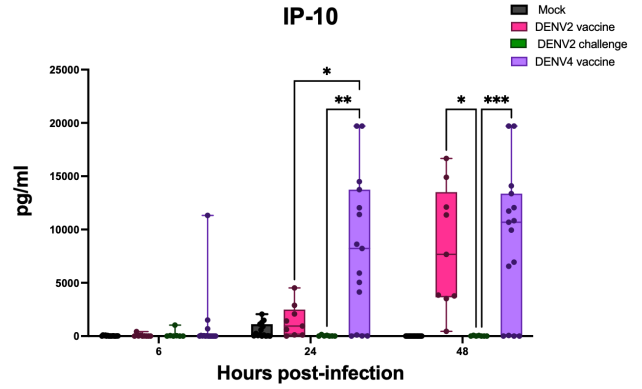**F**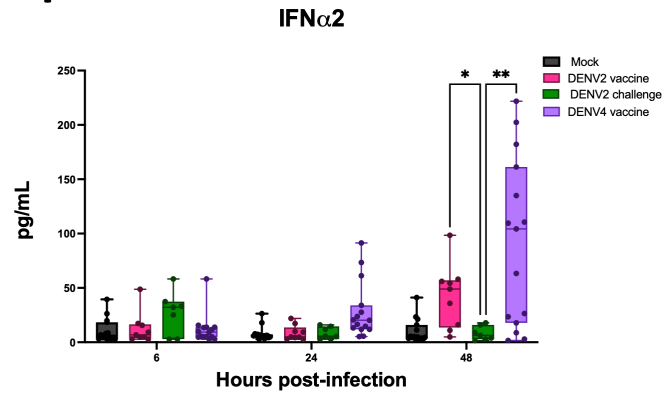

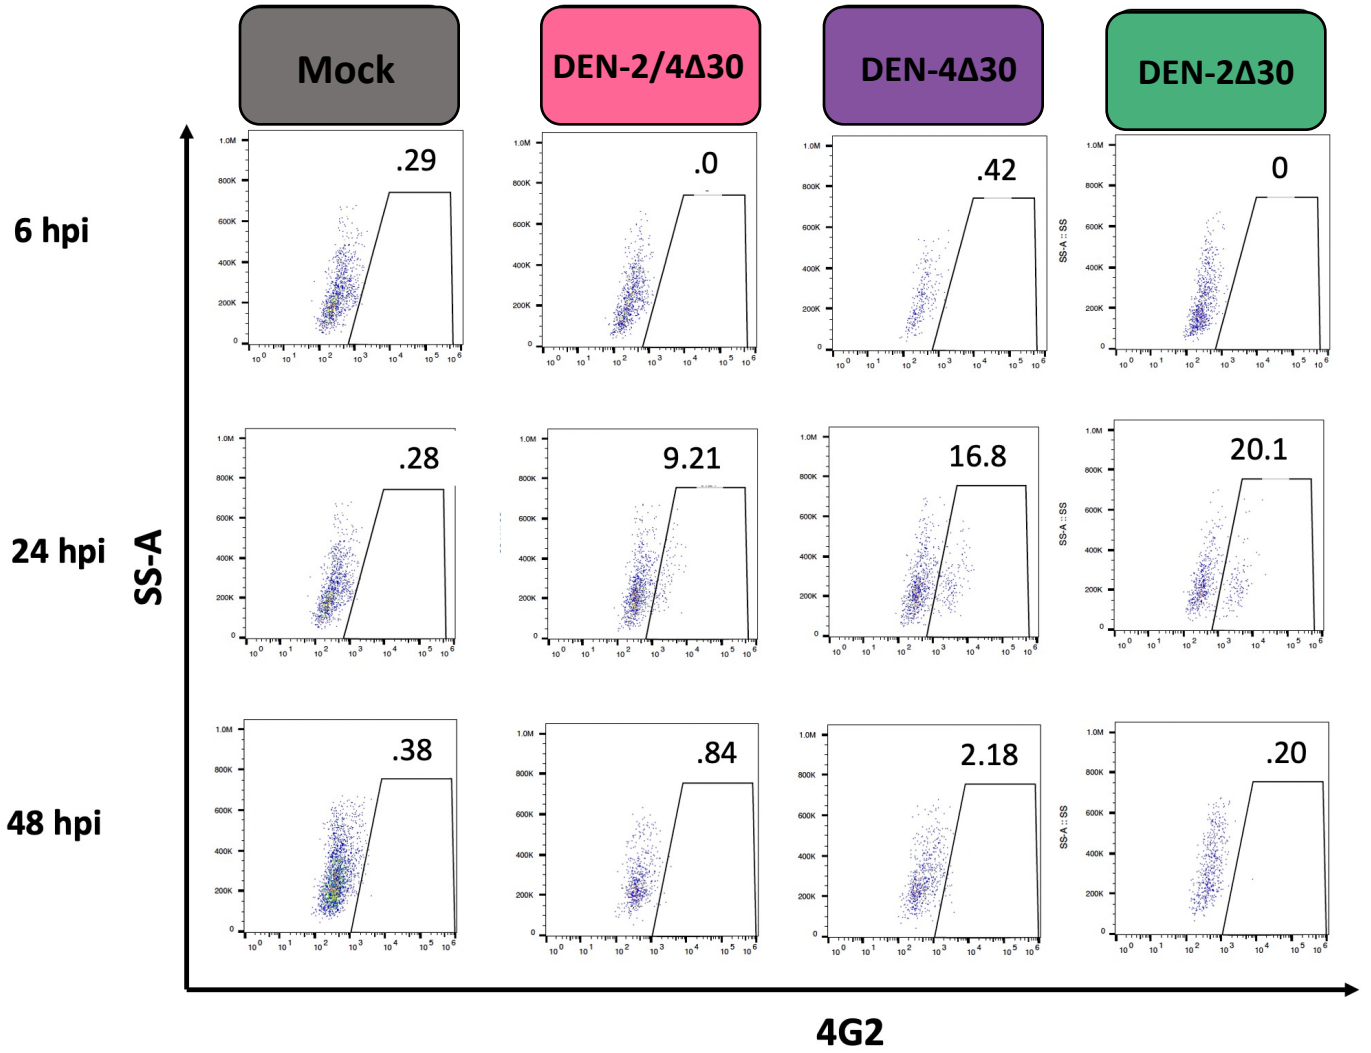

Table 1.

| Channel | Target    | Clone    | Manufacturer   |
|---------|-----------|----------|----------------|
| 89 Y    | CD45      | HI30     | Fluidigm       |
| 115 In  | CD11c     | REA618   | Miltenyi       |
| 142 Nd  | Caspase 3 | D3E9     | Fluidigm       |
| 144 Nd  | CD141     | Phx-01   | Biolegend      |
| 147 Sm  | IL-1b     | H1b-27   | Biolegend      |
| 148 Nd  | CD16      | REA423   | Miltenyi       |
| 150 Nd  | CD1c      | REA694   | Miltenyi       |
| 151 Eu  | CD123     | REA918   | Miltenyi       |
| 152 Sm  | TNFa      | Mab11    | Fluidigm       |
| 153 Eu  | CD83      | HB15e    | Biolegend      |
| 154 Sm  | CD86      | IT2.2    | Biolegend      |
| 156 Gd  | IL-6      | MQ2-13A5 | Fluidigm       |
| 159 Tb  | CCR7      | G043H7   | Fluidigm       |
| 160 Gd  | CD14      | REA599   | Miltenyi       |
| 162 Dy  | CD80      | 2D10     | Biolegend      |
| 164 Dy  | CD40      | HB14     | Biolegend      |
| 165 Ho  | 4G2       |          |                |
| 166 Er  | CD169     | 7-239    | Biolegend      |
| 169 Tm  | IFNa2b    | 7N4-1    | BD Biosciences |
| 172 Yb  | CD209     | 9E9A8    | Biolegend      |
| 173 Yb  | IL-8      | BH0814   | Biolegend      |
| 174 Yb  | HLA-DR    | REA805   | Miltenyi       |
| 175 Lu  | E1D8      |          |                |
| 176 Yb  | CXCL10    | IP10     | J034D6         |
